# Supplementary material for: Routine Indocyanine Green-Guided Axillary Reverse Mapping Prevents Lymphedema Without Compromising Oncological Safety: 54-Month Follow-Up in a Middle-Income Setting
Source: Research Square preprint supplement (doi:10.21203/rs.3.rs-8281778/v1), 2025-12-30
Supplement: Supplementary file 1 [file 714edcfa058e7725a14b123d.docx]

**Table 1.** Baseline Characteristics After PSM (all SMD <0.08)

| **Characteristic** | **ARM (n=62)** | **Non-ARM (n=59)** | **p value** |
| --- | --- | --- | --- |
| **Age, years (mean ± SD)** | 56.9 ± 9.1 | 58.5 ± 8.6 | 0.36 |
| **BMI, kg/m² (median [IQR])** | 27.1 [23.5–30.8] | 27.7 [24.0–31.0] | 0.42 |
| **Neoadjuvant therapy** | 33 (53.2%) | 29 (49.2%) | 0.65 |
| **Mastectomy** | 45 (72.6%) | 46 (78.0%) | 0.49 |
| **Stage III** | 37 (59.7%) | 34 (57.6%) | 0.81 |
| **Node-positive (N1–N3)** | 45 (72.6%) | 37 (62.7%) | 0.24 |
